# Supplementary figures and images for: Adaptive Reductions in Left Ventricular Diastolic Compliance Protect the Heart From Stretch-Induced Stunning
Source: PubMed Central journal article supplement — JACC Basic Transl Sci. 2019 Aug 26;4(4):527–41. doi: 10.1016/j.jacbts.2019.04.002 (PMC6712414; doi:10.1016/j.jacbts.2019.04.002), 2019-08-26

## Experimental Flow Chart and Sample Sizes

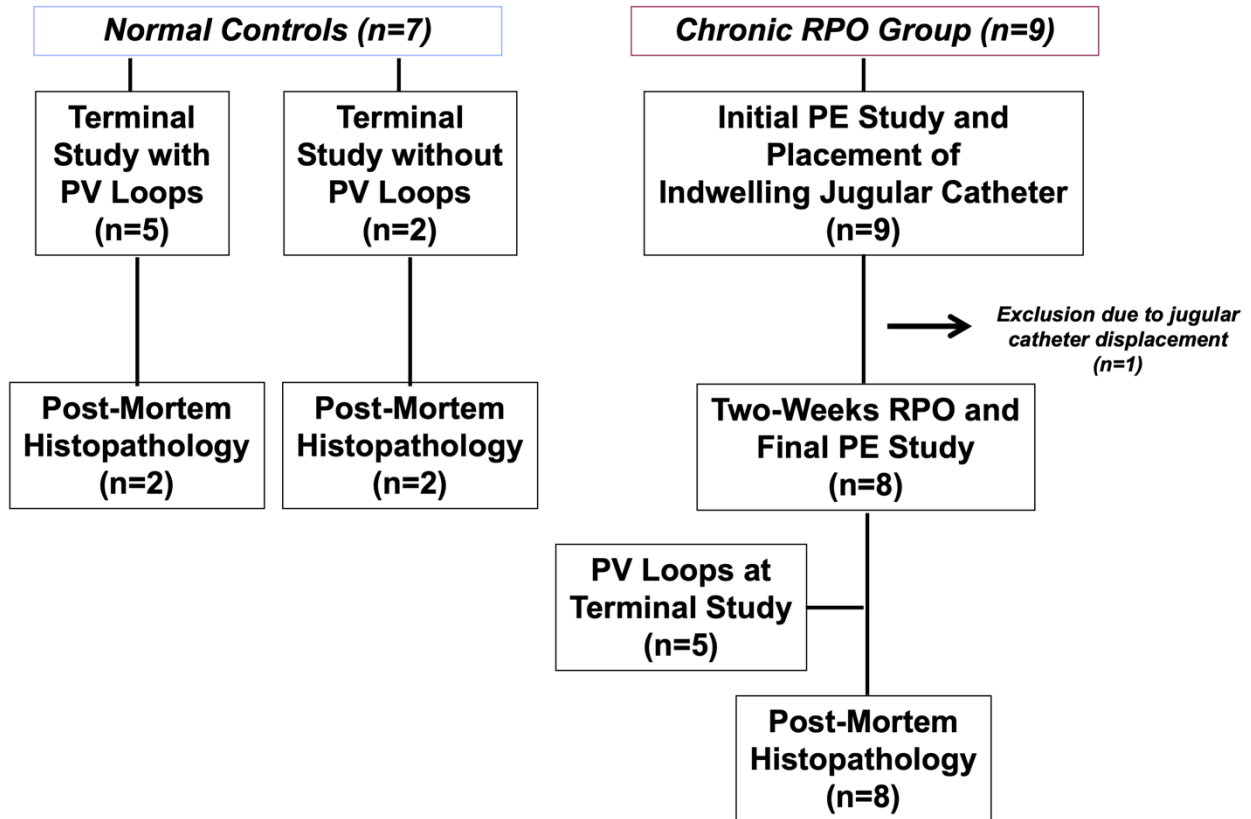

Supplement: mmc1.pdf [file mmc1.pdf]
